# Supplementary material for: Hydroxylated Tetramethoxyflavone Affects Intestinal Cell Permeability and Inhibits Cytochrome P450 Enzymes
Source: MDPI journal article supplement (doi:10.3390/molecules29020322), 2024-01-09
Supplement: s1 [file s1]

**Table S1. The occurrence of 3', 4', 5, 7-tetramethoxyflavone in natural products.**

| <b>Plant common name</b> | <b>Scientific name</b>         | <b>Form of tetramethoxyflavone</b> | <b>Reference</b>                                    |
|--------------------------|--------------------------------|------------------------------------|-----------------------------------------------------|
| Knobthorn Acacia         | <i>Acacia nigrescens</i>       | 3', 4', 5, 7-tetramethoxyflavone   | Fourie <i>et al.</i> , 1972                         |
| Maire's Alstonia         | <i>Alstonia mairei</i>         | 3', 4', 5, 7-tetramethoxyflavone   | KNAPSAcK Species-Metabolite Database                |
| Java Tea                 | <i>Orthosiphon spicatus</i>    | 3', 4', 5, 7-tetramethoxyflavone   | KNAPSAcK Species-Metabolite Database                |
| <i>Redwood</i>           | <i>Merrillia caloxylon</i>     | 3', 4', 5, 7- tetramethoxyflavone  | Fraser <i>et al.</i> , 1974                         |
| Fingerroot               | <i>Boesenbergia pandurata</i>  | 3', 4', 5, 7- tetramethoxyflavone  | KNAPSAcK Species-Metabolite Database                |
| Akane Madder             | <i>Rubia akane</i>             | 3', 4', 5, 7-tetramethoxyflavone   | Natural Product Activity and Species Source (NPASS) |
|                          | <i>Senecio platyphylloides</i> | 3', 4', 5, 7- tetramethoxyflavone  | Natural Product Activity and Species Source (NPASS) |
| Circassian Milk Vetch    | <i>Astragalus circassicus</i>  | 3', 4', 5, 7- tetramethoxyflavone  | Natural Product Activity and Species Source (NPASS) |
|                          | <i>Erythrina hypaphorus</i>    | 3', 4', 5, 7- tetramethoxyflavone  | Natural Product Activity and Species Source (NPASS) |
|                          | <i>Sphaeria rousseliana</i>    | 3', 4', 5, 7- tetramethoxyflavone  | Natural Product Activity and Species Source (NPASS) |
| Fragrant Lip Fern        | <i>Cheilanthes fragrans</i>    | 3', 4', 5, 7- tetramethoxyflavone  | Natural Product Activity and Species Source (NPASS) |
| Kahikatea                | <i>Podocarpus dacrydioides</i> | 3', 4', 5, 7- tetramethoxyflavone  | Natural Product Activity and Species Source (NPASS) |
| Hellebore                | <i>Helleborus macranthus</i>   | 3', 4', 5, 7- tetramethoxyflavone  | Natural Product Activity and Species Source (NPASS) |
| Rosemary Willow          | <i>Salix rosmarinifolia</i>    | 3', 4', 5, 7- tetramethoxyflavone  | Natural Product Activity and Species Source (NPASS) |
|                          | <i>Aniba santalodora</i>       | 3', 4', 5, 7- tetramethoxyflavone  | Natural Product Activity and Species Source (NPASS) |

|                                 |                                                           |                                   |                                                                                                                                                                                   |
|---------------------------------|-----------------------------------------------------------|-----------------------------------|-----------------------------------------------------------------------------------------------------------------------------------------------------------------------------------|
|                                 | <i>Colchicum filifolium</i>                               | 3', 4', 5, 7- tetramethoxyflavone | Natural Product Activity and Species Source (NPASS)                                                                                                                               |
| Kashmir Iris                    | <i>Iris kashmiriana</i>                                   | 3', 4', 5, 7- tetramethoxyflavone | Natural Product Activity and Species Source (NPASS)                                                                                                                               |
| Velvet Belly<br>Lanternshark    | <i>Etmopterus spinax (velvet<br/>belly lantern shark)</i> | 3', 4', 5, 7- tetramethoxyflavone | Natural Product Activity and Species Source (NPASS)                                                                                                                               |
|                                 | <i>Lemonia spectabilis</i>                                | 3', 4', 5, 7- tetramethoxyflavone | Natural Product Activity and Species Source (NPASS)                                                                                                                               |
| Joseph Scale                    | <i>Matsucoccus josephi</i>                                | 3', 4', 5, 7- tetramethoxyflavone | Natural Product Activity and Species Source (NPASS)                                                                                                                               |
|                                 | <i>Centaurea sonchifolia</i>                              | 3', 4', 5, 7- tetramethoxyflavone | Natural Product Activity and Species Source (NPASS)                                                                                                                               |
| Sand Chamomile                  | <i>Matricaria sabulosa</i>                                | 3', 4', 5, 7- tetramethoxyflavone | Natural Product Activity and Species Source (NPASS)                                                                                                                               |
| Thai Black<br>Ginger            | <i>Kaempferia parviflora</i>                              | 3', 4', 5, 7- tetramethoxyflavone | Azuma <i>et al.</i> , 2008, Chaipech <i>et al.</i> , 2012, Lu <i>et al.</i> ,<br>2012<br>KNApSACk Species-Metabolite Database<br>LOTUS - the natural products occurrence database |
| Giant Sensitive<br>Plant        | <i>Mimosa pigra</i>                                       | 3', 4', 5, 7- tetramethoxyflavone | Natural Product Activity and Species Source (NPASS)                                                                                                                               |
| Konjac                          | <i>Amorphophallus konjac</i>                              | 3', 4', 5, 7- tetramethoxyflavone | Natural Product Activity and Species Source (NPASS)                                                                                                                               |
|                                 | <i>Lonchocarpus chiricanus</i>                            | 3', 4', 5, 7- tetramethoxyflavone | Natural Product Activity and Species Source (NPASS)                                                                                                                               |
| Cat's Whiskers                  | <i>Orthosiphon aristatus</i>                              | 3', 4', 5, 7- tetramethoxyflavone | LOTUS - the natural products occurrence database                                                                                                                                  |
|                                 | <i>Mucuna holtonii</i>                                    | 3', 4', 5, 7- tetramethoxyflavone | Natural Product Activity and Species Source (NPASS)                                                                                                                               |
| Canary Island<br>Pheasant's Eye | <i>Bethencourtia palmensis</i>                            | 3', 4', 5, 7- tetramethoxyflavone | Natural Product Activity and Species Source (NPASS)                                                                                                                               |
| Kumquat                         | <i>Citrus japonica</i>                                    | 3', 4', 5, 7- tetramethoxyflavone | Mizuno <i>et al.</i> , 1991<br>LOTUS - the natural products occurrence database                                                                                                   |
| Orange Jessamine                | <i>Murraya paniculata</i>                                 | 3', 4', 5, 7- tetramethoxyflavone | LOTUS - the natural products occurrence database                                                                                                                                  |

|                           |                                                                |                                   |                                                                                                                    |
|---------------------------|----------------------------------------------------------------|-----------------------------------|--------------------------------------------------------------------------------------------------------------------|
|                           |                                                                |                                   | KNApSack Species-Metabolite Database<br>Zhang <i>et al.</i> , 2011                                                 |
| Fingerroot                | <i>Boesenbergia rotunda</i>                                    | 3', 4', 5, 7- tetramethoxyflavone | LOTUS - the natural products occurrence database<br>Tuchinda <i>et al.</i> , 2002<br>Jaipetch <i>et al.</i> , 1983 |
| Kinokuni<br>Kumquat       | <i>Citrus kinokuni</i>                                         | 3', 4', 5, 7- tetramethoxyflavone | LOTUS - the natural products occurrence database                                                                   |
| Purple Coral Pea          | <i>Hardenbergia violacea</i>                                   | 3', 4', 5, 7- tetramethoxyflavone | Natural Product Activity and Species Source (NPASS)                                                                |
|                           | <i>Campanula choziatowskyi</i>                                 | 3', 4', 5, 7- tetramethoxyflavone | Natural Product Activity and Species Source (NPASS)                                                                |
|                           | <i>Beilschmiedia madang</i>                                    | 3', 4', 5, 7- tetramethoxyflavone | Natural Product Activity and Species Source (NPASS)                                                                |
|                           | <i>Pterocaulon serrulatum</i>                                  | 3', 4', 5, 7- tetramethoxyflavone | Natural Product Activity and Species Source (NPASS)                                                                |
|                           | <i>Preussia terricola</i>                                      | 3', 4', 5, 7- tetramethoxyflavone | Natural Product Activity and Species Source (NPASS)                                                                |
| Lavender Sage             | <i>Salvia lavanduloides</i>                                    | 3', 4', 5, 7- tetramethoxyflavone | Natural Product Activity and Species Source (NPASS)                                                                |
|                           | <i>Petunia axillaris subsp. parodii</i>                        | 3', 4', 5, 7- tetramethoxyflavone | Natural Product Activity and Species Source (NPASS)                                                                |
|                           | <i>Heliotropium scabrum</i>                                    | 3', 4', 5, 7- tetramethoxyflavone | Natural Product Activity and Species Source (NPASS)                                                                |
|                           | <i>Stephania dielsiana</i>                                     | 3', 4', 5, 7- tetramethoxyflavone | Natural Product Activity and Species Source (NPASS)                                                                |
| Gentian Sage              | <i>Salvia patens</i>                                           | 3', 4', 5, 7- tetramethoxyflavone | Natural Product Activity and Species Source (NPASS)                                                                |
| Chinese Pulsatilla        | <i>Pulsatilla chinensis</i>                                    | 3', 4', 5, 7- tetramethoxyflavone | Natural Product Activity and Species Source (NPASS)                                                                |
| Sweetbread                | <i>Lactarius mitissimus</i>                                    | 3', 4', 5, 7- tetramethoxyflavone | Natural Product Activity and Species Source (NPASS)                                                                |
| Milkcap                   |                                                                |                                   |                                                                                                                    |
| European Hop-<br>Hornbeam | <i>Ostrya carpinifolia</i><br>( <i>European hop-hornbeam</i> ) | 3', 4', 5, 7- tetramethoxyflavone | Natural Product Activity and Species Source (NPASS)                                                                |

|                         |                                        |                                   |                                                                                          |
|-------------------------|----------------------------------------|-----------------------------------|------------------------------------------------------------------------------------------|
| Blue Vervain            | <i>Salvia virgata</i>                  | 3', 4', 5, 7- tetramethoxyflavone | Natural Product Activity and Species Source (NPASS)                                      |
| Northern Pike           | <i>Esox lucius (northern pike)</i>     | 3', 4', 5, 7- tetramethoxyflavone | Natural Product Activity and Species Source (NPASS)                                      |
|                         | <i>Maclura cochinchinensis</i>         | 3', 4', 5, 7- tetramethoxyflavone | Natural Product Activity and Species Source (NPASS)                                      |
| Douglas Fir             | <i>Orgyia pseudotsugata</i>            | 3', 4', 5, 7- tetramethoxyflavone | Natural Product Activity and Species Source (NPASS)                                      |
| Tussock Moth            | <i>(Douglas fir tussock moth)</i>      |                                   |                                                                                          |
| Blackjack Oak           | <i>Quercus marilandica</i>             | 3', 4', 5, 7- tetramethoxyflavone | Natural Product Activity and Species Source (NPASS)                                      |
| Mandarin Orange         | <i>Citrus reticulata</i>               | 3', 4', 5, 7- tetramethoxyflavone | KNAPSAcK Species-Metabolite Database<br>LOTUS - the natural products occurrence database |
| Ginger                  | <i>Zingiber officinale</i>             | 3', 4', 5, 7- tetramethoxyflavone | KNAPSAcK Species-Metabolite Database                                                     |
|                         | <i>Bryobium eriaeoides</i>             | 3', 4', 5, 7- tetramethoxyflavone | Asamenew <i>et al.</i> , 2019<br>LOTUS - the natural products occurrence database        |
|                         | <i>Dialium excelsum</i>                | 3', 4', 5, 7- tetramethoxyflavone | Natural Product Activity and Species Source (NPASS)                                      |
| Blazingstar             | <i>Mentzelia decapetala</i>            | 3', 4', 5, 7- tetramethoxyflavone | Natural Product Activity and Species Source (NPASS)                                      |
| Urban's Pitcher<br>Sage | <i>Lepechinia urbanii</i>              | 3', 4', 5, 7- tetramethoxyflavone | Natural Product Activity and Species Source (NPASS)                                      |
|                         | <i>Piper porphyrophyllum</i>           | 3', 4', 5, 7- tetramethoxyflavone | Rajudin <i>et al.</i> , 2010.<br>LOTUS - the natural products occurrence database        |
| Rough Starthistle       | <i>Centaurea scoparia</i>              | 3', 4', 5, 7- tetramethoxyflavone | Natural Product Activity and Species Source (NPASS)                                      |
|                         | <i>Fadogia agrestis</i>                | 3', 4', 5, 7- tetramethoxyflavone | Natural Product Activity and Species Source (NPASS)                                      |
| Calamondin              | <i>Citrus x aurantium f. deliciosa</i> | 3', 4', 5, 7- tetramethoxyflavone | LOTUS - the natural products occurrence database                                         |
|                         | <i>Parmotrema nilgherrense</i>         | 3', 4', 5, 7- tetramethoxyflavone | Natural Product Activity and Species Source (NPASS)                                      |

|                  |                                  |                                   |                                                     |
|------------------|----------------------------------|-----------------------------------|-----------------------------------------------------|
|                  | <i>Thalassiosira weissflogii</i> | 3', 4', 5, 7- tetramethoxyflavone | Natural Product Activity and Species Source (NPASS) |
| Hound's Tongue   | <i>Cynoglossum macrostylum</i>   | 3', 4', 5, 7- tetramethoxyflavone | Natural Product Activity and Species Source (NPASS) |
| Heartleaf        | <i>Drymaria cordata</i>          | 3', 4', 5, 7- tetramethoxyflavone | Natural Product Activity and Species Source (NPASS) |
| Drymaria         |                                  |                                   |                                                     |
| Variegated       | <i>Aconitum variegatum</i>       | 3', 4', 5, 7- tetramethoxyflavone | Natural Product Activity and Species Source (NPASS) |
| Monkshood        |                                  |                                   |                                                     |
| Tangerine        | <i>Citrus tangerina</i>          | 3', 4', 5, 7- tetramethoxyflavone | Kim <i>et al.</i> , 2009                            |
| Orange Jessamine | <i>Murraya exotica</i>           |                                   | Wu <i>et al.</i> , 2018                             |

---

#### Reference:

1. Fraser, A.W.; Lewis, J.R. Eupatorin, a constituent of *Merrillia caloxylon*. *Planta Med.* **1974**, *13*(8), 1561–1564. doi.org/10.1016/0031-9422(74)80328-6.
2. Azuma, T.; Tanaka, Y.; Kikuzaki, H. Phenolic glycosides from *Kaempferia parviflora*. *Phytochemistry*. **2008**, *69*(15), 2743–2748. doi: 10.1016/j.phytochem.2008.09.001.
3. Chaipech, S.; Morikawa, T.; Ninomiya, K.; Yoshikawa, M.; Pongpiriyadacha, Y.; Hayakawa, T.; Muraoka, O. Structures of two new phenolic glycosides, kaempferiaosides A and B, and hepatoprotective constituents from the rhizomes of *Kaempferia parviflora*. *Chem Pharm Bull (Tokyo)*. **2012**, *60*(1), 62–69. doi: 10.1248/cpb.60.62.
4. Azuma, T.; Tanaka, Y.; Kikuzaki, H. Phenolic glycosides from *Kaempferia parviflora*. *Phytochemistry*. **2008**, *69*(15), 2743–2748. doi: 10.1016/j.phytochem.2008.09.001.
5. Mizuno, M.; Iinuma, M.; Ohara, M.; Tanaka, T.; Iwamasa, M. Chemotaxonomy of the Genus Citrus Based on Polymethoxyflavones. *Chem Pharm Bull (Tokyo)*. **1991**, *39*, 945–949. doi.org/10.1248/cpb.39.945.

6. Zhang, J.Y.; Li, N.; Che, Y.Y.; Zhang, Y.; Liang, S.X.; Zhao, M.B.; Jiang, Y.; Tu, P.F. Characterization of seventy polymethoxylated flavonoids (PMFs) in the leaves of *Murraya paniculata* by on-line high-performance liquid chromatography coupled to photodiode array detection and electrospray tandem mass spectrometry. *J Pharm Biomed Anal.* **2011**, *56*(5), 950–961. doi: 10.1016/j.jpba.2011.08.019.
7. Tuchinda, P.; Reutrakul, V.; Claeson, P.; Pongprayoon, U.; Sematongz, T.; Santisuk, T.; Taylor, W.C. Anti-inflammatory cyclohexenyl chalcone derivatives in *Boesenbergia pandurata*. *Phytochemistry.* **2002**, *59*(2), 169–173. doi: 10.1016/s0031-9422(01)00451-4.
8. Jaipetch, T.; Reutrakul, V.; Tuntiwachwuttikul, P.; Santisuk, T. Flavonoids in the black rhizomes of *Boesenbergia panduta*. *Phytochemistry.* **1983**, *22*(2), 625–626. doi.org/10.1016/0031-9422(83)83075-1.
9. Asamenew, G.; Kim, H.W.; Lee, M.K. Characterization of phenolic compounds from normal ginger (*Zingiber officinale* Rosc.) and black ginger (*Kaempferia parviflora* Wall.) using UPLC–DAD–QToF–MS. *Eur Food Res Technol.* **2019**, *245*, 653–665. doi.org/10.1007/s00217-018-3188-z.
10. Rajudin, E.; Ahmad, F.; Sirat, H.M.; Arbain, D.; Aboul-Enein, H.Y. Chemical constituents from tiger's betel, *Piper porphyrophyllum* N.E.Br. (*Fam. Piperaceae*). *Nat Prod Res.* **2010**, *24*(4), 387–390. doi: 10.1080/14786410903421826.
11. Kim, Y.D.; Ko, W.J.; Koh, K.S.; Jeon, Y.J.; Kim, S.H. Composition of Flavonoids and Antioxidative Activity from Juice of Jeju Native Citrus Fruits during Maturation. *Korean J Nutr.* **2009**, *42*(3), 278–290. doi.org/10.4163/kjn.2009.42.3.278.
12. Lu, W.C.; Sheen, J.F.; Hwang, L.S.; Wei, G.J. Identification of 5,7,3',4'-tetramethoxyflavone metabolites in rat urine by the isotope-labeling method and ultrahigh-performance liquid chromatography-electrospray ionization-mass spectrometry. *J Agric Food Chem.* **2012**, *60*(33), 8123–8128. doi: 10.1021/jf302043a.
13. Fourie, T.G.; du Preez, I.C.; Roux, D.G.; 3',4',7,8-tetrahydroxyflavonoids from the heartwood of *Acacia nigrescens* and their conversion products. *Phytochemistry.* **1972**, *11*(5), 1763–1770.
14. Li, S.M.; Yang, J.L.; Liu Y.P.; Fu, Y.H. Studies on non-alkaloid constituents from *Alstonia mairei*. *Chinese Tradit Herb Drugs.* **2015**, *24*, 2683–2688.

**Table S2. Chemical-Disease Co-Occurrences that can be prevented by 5,7,3',4'-tetramethoxyflavone.**

| Decease                               | <i>In vivo/In vitro</i>                                                   | Form of tetramethoxyflavone studied | Mechanism                                                                                                                               | Reference                     |
|---------------------------------------|---------------------------------------------------------------------------|-------------------------------------|-----------------------------------------------------------------------------------------------------------------------------------------|-------------------------------|
| inflammatory diseases                 | <i>In vitro</i> : human mast cells (LAD2)                                 | 5,7,3',4'-tetramethoxyflavone       | Increases gene expression and release of tumor necrosis factor, C-X-C motif chemokine ligand 8, and vascular endothelial growth factor. | Patel <i>et al.</i> , 2017    |
| allergic and inflammatory conditions. | <i>In vitro</i> : primary human cord blood-derived cultured mast cells    | 5,7,3',4'-tetramethoxyflavone       | Inhibit intracellular calcium level increases and nuclear factor $\kappa$ B induction                                                   | Weng <i>et al.</i> , 2015     |
| inflammatory diseases                 | <i>In vitro</i> : human mast cells (LAD2) and primary mast cells (hCBMCs) | 5,7,3',4'-tetramethoxyflavone       | Release of CCL5 and CCL2 and inhibit the activation of p38 $\alpha$ MAPK, JNK, and I $\kappa$ B- $\alpha$                               | Bawazeer <i>et al.</i> , 2019 |
| osteoarthritis                        | <i>In vivo</i> : OA rat models                                            | 5,7,3',4'-tetramethoxyflavone       | Inhibiting both EP/cAMP/PKA signaling pathway and $\beta$ -catenin signaling pathway                                                    | Wu <i>et al.</i> , 2014       |
| osteoarthritis                        | <i>In vitro</i> : C28/I2 cells.                                           | 5,7,3',4'-tetramethoxyflavone       | Cholesterol dysregulation by increasing the expression of FOXO3a/LXR $\alpha$ /ABCA1 signaling through SIRT1                            | Peng <i>et al.</i> , (2021)   |

|                                                                                        |                                                                         |                                  |                                                                                                                                   |                                  |
|----------------------------------------------------------------------------------------|-------------------------------------------------------------------------|----------------------------------|-----------------------------------------------------------------------------------------------------------------------------------|----------------------------------|
| antiinflammatory                                                                       | <i>In vivo</i> : mice                                                   | 3', 4', 7, 8-tetramethoxyflavone | Inhibit synovial human recombinant phospholipase A2 activity, human platelet TXB2 generation, and human neutrophil degranulation. | Ballesteros <i>et al.</i> , 1995 |
| osteoarthritis                                                                         | <i>In vivo</i> : rats' knee cartilages                                  | 3', 4', 7, 8-tetramethoxyflavone | activating the expression of IRE1 $\alpha$                                                                                        | Wu <i>et al.</i> , 2018          |
| inflammatory diseases                                                                  | <i>In vitro</i> : human mast cells (LAD2)                               | 3', 4', 7, 8-tetramethoxyflavone | Interaction between neurokinin-1 and ST2 receptors antagonists and siRNA inhibits TNF secretion                                   | Taracanova <i>et al.</i> , 2017  |
| neurodegenerative diseases                                                             | <i>In vitro</i> : mast cells and microglia                              | 3', 4', 7, 8-tetramethoxyflavone | Inhibit corticotropin-releasing hormone, neurotensin, and substance P                                                             | Theoharides <i>et al.</i> , 2018 |
| allergies, atopic dermatitis, chronic urticaria, cutaneous mastocytosis, and psoriasis | <i>In vivo</i> : mastocytosis or mast cell activation syndrome patients | 3', 4', 7, 8-tetramethoxyflavone | Antiallergic and anti-inflammatory actions                                                                                        | Theoharides <i>et al.</i> , 2017 |
| Osteoarthritis                                                                         | <i>In vivo</i> : osteoarthritis rat models                              | 3', 4', 7, 8-tetramethoxyflavone | Inhibiting both EP/cAMP/PKA signaling pathway and $\beta$ -catenin signaling pathway                                              | Wu <i>et al.</i> , 2014          |
| Osteoarthritis                                                                         | <i>In vitro</i> : C28/I2 cells                                          | 3', 4', 7, 8-tetramethoxyflavone | Increasing the expression of FOXO3a/LXR $\alpha$ /ABCA1 signaling through SIRT1 and ameliorates cholesterol dysregulation         | Peng <i>et al.</i> , 2021        |
| Osteoarthritis                                                                         | <i>In vivo</i> : rat knee osteoarthritis models                         | 3', 4', 7, 8-tetramethoxyflavone | Up regulating Foxo3a expression and subsequently inhibiting miR-29a/Wnt/ $\beta$ -catenin signaling activity                      | Huang <i>et al.</i> , 2019       |
| Osteoarthritis                                                                         | <i>In vitro</i> : osteoarthritic chondrocytes                           | 3', 4', 7, 8-tetramethoxyflavone | Inhibiting PGE2-induced ERS and GSK-3 $\beta$                                                                                     | Yang <i>et al.</i> , 2015        |
| Osteoarthritis                                                                         | <i>In vitro</i> : chondrocyte                                           | 3', 4', 7, 8-                    | Inhibition of Endoplasmic reticulum stress-induced                                                                                | Yuan <i>et al.</i> ,             |



|                               |                                                                          |                                                         |                                                                                                                                                                                          |                                    |
|-------------------------------|--------------------------------------------------------------------------|---------------------------------------------------------|------------------------------------------------------------------------------------------------------------------------------------------------------------------------------------------|------------------------------------|
| Psoriasis                     | <i>In vitro</i> : human HaCaT and normal epidermal human keratinocytes   | tetramethoxyflavone<br>3', 4', 7, 8-tetramethoxyflavone | apoptosis with down regulation of GSK-3 $\beta$<br>Inhibiting tumor necrosis factor stimulates skin inflammation via mTOR (pmTORSer2448 , pp70S6KThr389 and p4EBP1Thr37/46 ) signalling. | 2017<br>Patel <i>et al.</i> , 2018 |
| Anti-inflammatory             | <i>In vitro</i> : RAW264.7 cells                                         |                                                         | Inhibited expression of iNOS mRNA and iNOS protein                                                                                                                                       | Sae-Wong <i>et al.</i> , 2011      |
| Amyotrophic lateral sclerosis | <i>In vivo</i> : amyotrophic lateral sclerosis mouse model (TgSOD1 mice) | 3', 4', 7, 8-tetramethoxyflavone                        | Reduced degranulation of mast cells in the tibialis anterior muscle                                                                                                                      | Theoharides <i>et al.</i> , 2020   |
| Gout                          | <i>In vitro</i> : xanthine oxidase                                       | 3', 4', 7, 8-tetramethoxyflavone                        | Inhibitory xanthine oxidase                                                                                                                                                              | Nakao <i>et al.</i> , 2011         |
| Benign prostate hyperplasia   | <i>In vivo</i> : castrated mice                                          | 3', 4', 7, 8-tetramethoxyflavone                        | Suppressed the weights of prostates and seminal vesicles                                                                                                                                 | Murata <i>et al.</i> , 2013        |

### Reference:

1. Ballesteros, J.F.; Sanz, M.J.; Ubeda, A.; Miranda, M.A.; Iborra, S.; Payá, M.; Alcaraz, M.J. Synthesis and pharmacological evaluation of 2'-hydroxychalcones and flavones as inhibitors of inflammatory mediators generation. *J Med Chem.* **1995**, *38*(14), 2794–2797. doi: 10.1021/jm00014a032. PMID: 7629818.
2. Peng, F.; Huang, X.; Shi, W.; Xiao, Y.; Jin, Q.; Li, L.; Xu, D.; Wu, L. 5,7,3',4'-tetramethoxyflavone ameliorates cholesterol dysregulation by mediating SIRT1/FOXO3a/ABCA1 signaling in osteoarthritis chondrocytes. *Future Med Chem.* **2021**, *13*(24), 2153–2166. doi: 10.4155/fmc-2021-0247.
3. Wu, L.; Liu, H.; Li, L.; Liu, H.; Yang, K.; Liu, Z.; Huang, H. 5,7,3',4'-Tetramethoxyflavone exhibits chondroprotective activity by targeting

- $\beta$ -catenin signaling in vivo and in vitro. *Biochem Biophys Res Commun.* **2014**, 452(3), 682–688. doi: 10.1016/j.bbrc.2014.08.129.
4. Wu, L.; Liu, H.; Li, L.; Xu, D.; Gao, Y.; Guan, Y.; Chen, Q. 5,7,3',4'-Tetramethoxyflavone protects chondrocytes from ER stress-induced apoptosis through regulation of the IRE1 $\alpha$  pathway. *Connect Tissue Res.* **2018**, 59(2), 157–166. doi: 10.1080/03008207.2017.1321639.
  5. Weng, Z.; Patel, A.B.; Panagiotidou, S.; Theoharides, T.C. The novel flavone tetramethoxyluteolin is a potent inhibitor of human mast cells. *J Allergy Clin Immunol.* **2015**, 135(4), 1044–1052.e5. doi: 10.1016/j.jaci.2014.10.032.
  6. Bawazeer, M.A.; Theoharides, T.C. IL-33 stimulates human mast cell release of CCL5 and CCL2 via MAPK and NF- $\kappa$ B, inhibited by methoxyluteolin. *Eur J Pharmacol*, **2019**, 865, 172760. doi: 10.1016/j.ejphar.2019.172760.
  7. Patel, A.B.; Theoharides, T.C. Methoxyluteolin Inhibits Neuropeptide-stimulated Proinflammatory Mediator Release via mTOR Activation from Human Mast Cells. *J Pharmacol Exp Ther.* **2017**, 361(3), 462–471. doi: 10.1124/jpet.117.240564.
  8. Taracanova, A.; Alevizos, M.; Karagkouni, A.; Weng, Z.; Norwitz, E.; Conti, P.; Leeman, S.E.; Theoharides, T.C. SP and IL-33 together markedly enhance TNF synthesis and secretion from human mast cells mediated by the interaction of their receptors. *Proc Natl Acad Sci USA.* **2017**, 114(20), E4002–E4009. doi: 10.1073/pnas.1524845114.
  9. Theoharides, T.C.; Tsilioni, I. Tetramethoxyluteolin for the Treatment of Neurodegenerative Diseases. *Curr Top Med Chem.* **2018**, 18(21), 1872–1882. doi: 10.2174/1568026617666181119154247.
  10. Theoharides, T.C.; Stewart, J.M.; Tsilioni, I. Tolerability and benefit of a tetramethoxyluteolin-containing skin lotion. *Int J Immunopathol Ph.* **2017**, 30(2), 146–151. doi: 10.1177/0394632017707610.
  11. Wu, L.; Liu, H.; Li, L.; Liu, H.; Yang, K.; Liu, Z.; Huang, H. 5,7,3',4'-Tetramethoxyflavone exhibits chondroprotective activity by targeting  $\beta$ -catenin signaling in vivo and in vitro. *Biochem Biophys Res Commun.* **2014**, 452(3), 682–688. doi: 10.1016/j.bbrc.2014.08.129.
  12. Peng, F.; Huang, X.; Shi, W.; Xiao, Y.; Jin, Q.; Li, L.; Xu, D.; Wu, L. 5,7,3',4'-tetramethoxyflavone ameliorates cholesterol dysregulation by mediating SIRT1/FOXO3a/ABCA1 signaling in osteoarthritis chondrocytes. *Future Med Chem.* **2021**, 13(24), 2153–2166. doi: 10.4155/fmc-2021-0247.
  13. Huang, X.; Chen, Z.; Shi, W.; Zhang, R.; Li, L.; Liu, H.; Wu, L. TMF inhibits miR-29a/Wnt/ $\beta$ -catenin signaling through upregulating Foxo3a activity in osteoarthritis chondrocytes. *Drug Des Devel Ther.* **2019**, 19(13), 2009–2019. doi: 10.2147/DDDT.S209694.

14. Yang, J.; Liu, H.; Li, L.; Liu, H.; Shi, W; Wu, L. The Chondroprotective Role of TMF in PGE2-Induced Apoptosis Associating with Endoplasmic Reticulum Stress. *Evid-Based Complement Altern Med.* **2015**, 2015, 297423. doi: 10.1155/2015/297423.
15. Yuan, X.; Li, L.; Shi, W.; Liu, H.; Huang, X.; Liu, Z.; Wu, L. TMF protects chondrocytes from ER stress-induced apoptosis by down-regulating GSK-3 $\beta$ . *Biomed Pharmacother.* **2017**, 89, 1262–1268. doi: 10.1016/j.biopha.2017.03.028.
16. Patel, A.B.; Tsilioni, I.; Weng, Z.; Theoharides, T.C. TNF stimulates IL-6, CXCL8 and VEGF secretion from human keratinocytes via activation of mTOR, inhibited by tetramethoxyluteolin. *Exp Dermatol.* **2018**, 27(2), 135–143. doi: 10.1111/exd.13461.
17. Sae-Wong, C.; Matsuda, H.; Tewtrakul, S.; Tansakul, P.; Nakamura, S.; Nomura, Y.; Yoshikawa, M. Suppressive effects of methoxyflavonoids isolated from *Kaempferia parviflora* on inducible nitric oxide synthase (iNOS) expression in RAW 264.7 cells. *J Ethnopharmacol.* **2011**, 136(3), 488–495. doi: 10.1016/j.jep.2011.01.013.
18. Theoharides, T.C.; Tsilioni, I. Amyotrophic Lateral Sclerosis, Neuroinflammation, and Cromolyn. *Clin Ther.* **2020**, 42(3), 546–549. doi: 10.1016/j.clinthera.2020.01.010.
19. Nakao, K.; Murata, K.; Deguchiz, T.; Itoh, K.; Fujita, T.; Higashino, M.; Yoshioka, Y.; Matsumura, S.; Tanaka, R.; Shinada, T.; Ohfuné, Y.; Matsuda, H. Xanthine oxidase inhibitory activities and crystal structures of methoxyflavones from *Kaempferia parviflora* rhizome. *Biol Pharm Bull.* **2011**, 34(7), 1143–1146. doi: 10.1248/bpb.34.1143.
20. Murata, K.; Hayashi, H.; Matsumura, S.; Matsuda, H. Suppression of benign prostate hyperplasia by *Kaempferia parviflora* rhizome. *Pharmacognosy Res.* **2013**, 5(4), 309–314. doi: 10.4103/0974-8490.118827.
